# Supplementary material for: Ultrathin RhCo alloy nanowires with defect-rich active sites for alkaline hydrogen evolution electrocatalysis
Source: Royal Society of Chemistry journal article supplement (doi:10.1039/d3cc04195f), 2023-01-01
Supplement: d3cc04195f1.pdf [file d3cc04195f1.pdf]

## **Electronic Supplementary Information (ESI) for**

# **Ultrathin RhCo nanowires with defect-rich active sites for alkaline hydrogen evolution electrocatalysis**

Luyu Zhu,<sup>1</sup> Dongdong Xu,<sup>2,\*</sup> and Chenglin Yi<sup>1,\*</sup>

<sup>1</sup>Key Laboratory of Green Chemistry and Technology of Ministry of Education, College of Chemistry, Sichuan University, Chengdu 610064, China. E-mail: clyi@scu.edu.cn

<sup>2</sup>Jiangsu Key Laboratory of New Power Batteries, Jiangsu Collaborative Innovation Center of Biomedical Functional Materials, School of Chemistry and Materials Science, Nanjing Normal University, Nanjing 210023, China. E-mail: ddxu@njnu.edu.cn

## Experimental Sections

### Chemicals and materials

Rhodium chloride hydrate ( $\text{H}_3\text{RhCl}_6$ ), cobalt nitrate ( $\text{Co}(\text{NO}_3)_2$ ), iron nitrate ( $\text{Fe}(\text{NO}_3)_2$ ), nickel nitrate ( $\text{Ni}(\text{NO}_3)_2$ ), copper nitrate ( $\text{Cu}(\text{NO}_3)_2$ ), zinc nitrate ( $\text{Zn}(\text{NO}_3)_2$ ), dioctadecyldimethylammonium chloride (DODAC), cetyltrimethylammonium chloride (CTAC), L-ascorbic acid (AA), sodium borohydride ( $\text{NaBH}_4$ ), hydrazine ( $\text{N}_2\text{H}_4$ ), and commercial palladium carbon (Pd/C) were purchased from Alfa Aesar. Sodium hydroxide (NaOH), hydrochloric acid (HCl), and ethanol were obtained from Sinopharm Chemical Reagent Co. Ltd. Docosyltrimethylammonium chloride ( $\text{C}_{22}\text{TAC}$ ) was synthesized following the procedures in our previous report (*Chem. Sci.*, 2018, 9, 4451). All above reagents were utilized without further purification with analytical reagent grade.

### Synthesis of RhCo NWs and corresponding electrocatalysts

Ultrathin RhCo alloy NWs were prepared by a nanoconfined attachment route in an aqueous solution with DODAC as the template,  $\text{H}_3\text{RhCl}_6$  and  $\text{Co}(\text{NO}_3)_2$  as the metal precursors, and  $\text{NaBH}_4$  as the reducing agent. In a typical synthesis, 15.0 mg of DODAC was first dissolved in 5.0 mL of deionized  $\text{H}_2\text{O}$  to obtain a homogeneous solution at 75 °C. After cooling down to room temperature, 0.50 mL of HCl (200 mM), 0.40 mL of  $\text{H}_3\text{RhCl}_6$  solution (10 mM) and 0.20 mL of  $\text{Co}(\text{NO}_3)_2$  (10mM) were added into the surfactant solution. The solution was kept static at 25 °C for 30 min. Then, 0.50 mL of freshly prepared  $\text{NaBH}_4$  (0.13 M) was injected into above solution. After being reacted for 2 h, RhCo NWs were collected by centrifugation and further washed several times with ethanol/ $\text{H}_2\text{O}$ . Similarly, RhFe NWs, RhNi NWs, RhCu NWs, and RhZn NWs were prepared by the similar procedures but having different metal precursors of  $\text{Fe}(\text{NO}_3)_3$ ,  $\text{Ni}(\text{NO}_3)_2$ ,  $\text{Cu}(\text{NO}_3)_2$ , and  $\text{Zn}(\text{NO}_3)_2$ . Besides, monometallic Rh NWs were prepared by similar processes with  $\text{RhCl}_3$  as the sole metal precursor.

### Electrochemical hydrogen evolution reaction (HER) test

The electrocatalytic tests were performed on the CHI 660E electrochemical analyzer as reported in our previous work (*Small* 2023, 202208077; *Adv. Funct. Mater.* 2022, 32, 2208057). A three-electrodes system was used for all electrochemical tests (a carbon rod as the counter electrode, a silver/silver chloride electrode (SCE) as the reference electrode, and RhCo NWs coated onto glassy carbon electrode (GCE, 0.07065  $\text{cm}^2$ ) as the working electrode). A well-dispersed suspension of catalyst was

prepared by mixed solution of 1.0 mg nanocatalysts, 4.0 mg of Valcan XC-72, and 2.0 mL ethanol/H<sub>2</sub>O (1:3). Then, 25  $\mu$ L of Nafion solution (5.0 wt. %) was added and further treated under ultrasonic treatment for another 30 min. 6.0  $\mu$ L above-prepared catalysts ink was coated onto pre-treated GCE and dried before the electrocatalytic tests. Note: The Ag/AgCl electrode should be fresh and maintain in saturated KCl solution after the test immediately

### **Characterizations**

Mesoscopic morphology and atomic crystallographic structure were characterized on a JEM-F200 transmission electron microscope (TEM) operated at 200 kV. Elemental mappings were collected on FEI Talos F200X apparatuses at an accelerating voltage of 200 kV (high-angle annular dark-field scanning TEM (HAADF-STEM)). Crystallographic structure was also studied with X-ray diffraction (XRD) on powder samples using a D/max 2500 VL/PC diffractometer (Japan) equipped with graphite-monochromatized Cu K $\alpha$  radiation. Surface electronic states were performed on a scanning X-ray microprobe (Thermo ESCALAB 250Xi) under Al K $\alpha$  radiation (X-ray photoelectron spectra (XPS)). Inductively coupled plasma mass spectrometry (ICP-MS) was tested on a NexION 350D.

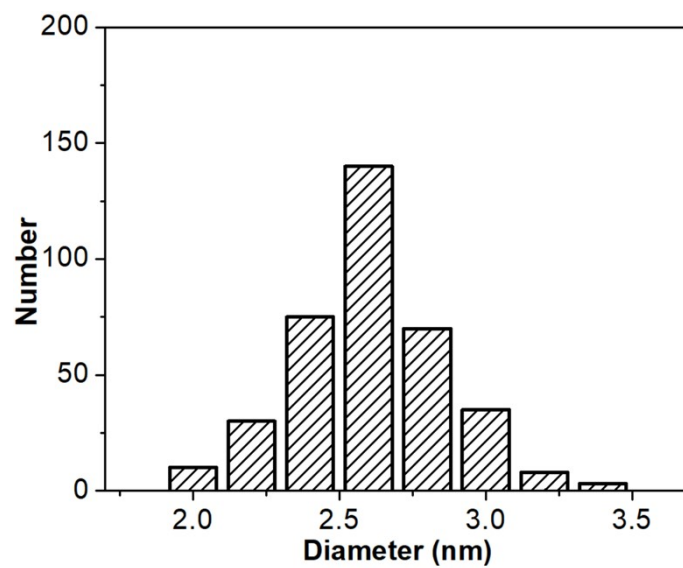

**Fig. S1** Average diameter of one-dimensional RhCo NWs summarized from ~400 samples.

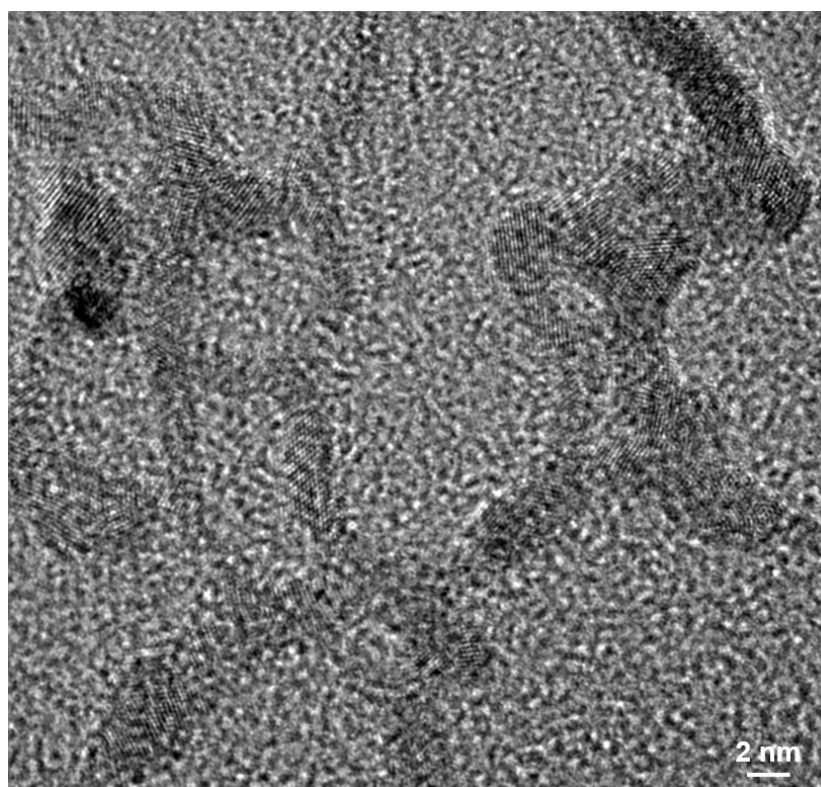

**Fig. S2** High-resolution TEM image of one-dimensional RhCo NWs.

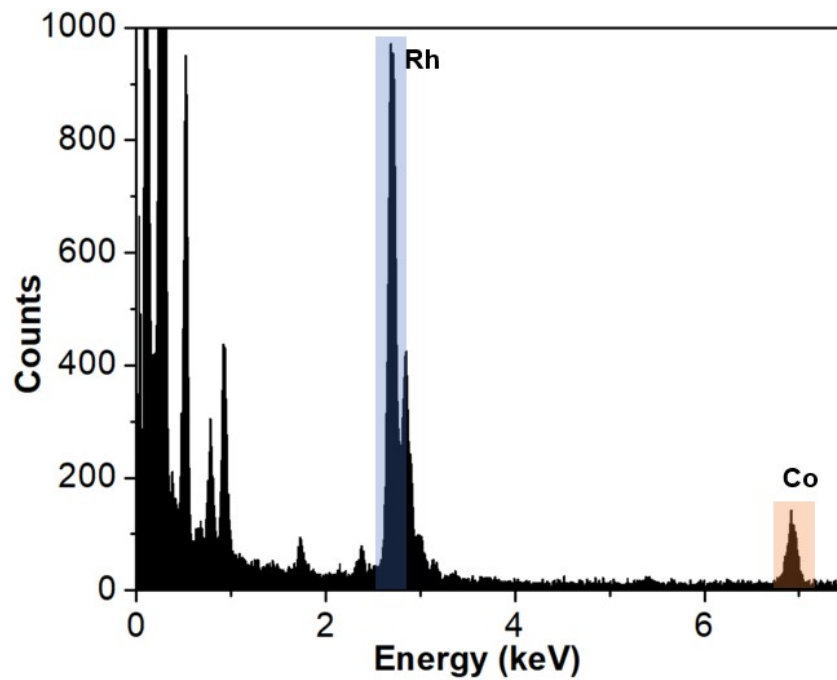

**Fig. S3** HAADF-STEM EDS spectra of one-dimensional RhCo NWs.

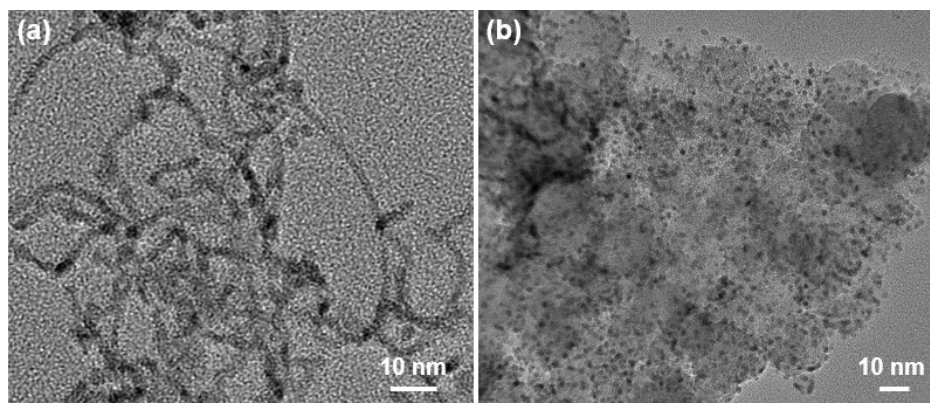

**Fig. S4** TEM images of (a) one-dimensional Rh NWs and (b) bimetallic RhCo NPs.

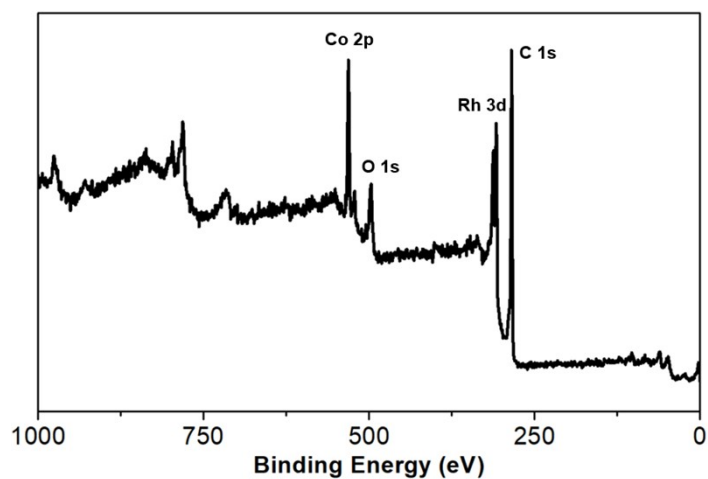

**Fig. S5** XPS survey spectrum of RhCo NWs.

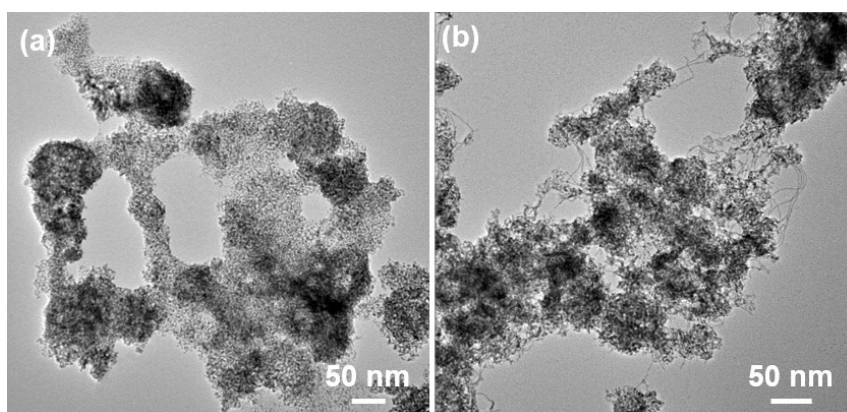

**Fig. S6** TEM images of RhCo nanostructures synthesized under (a) lower and (b) higher pH of reaction solution.

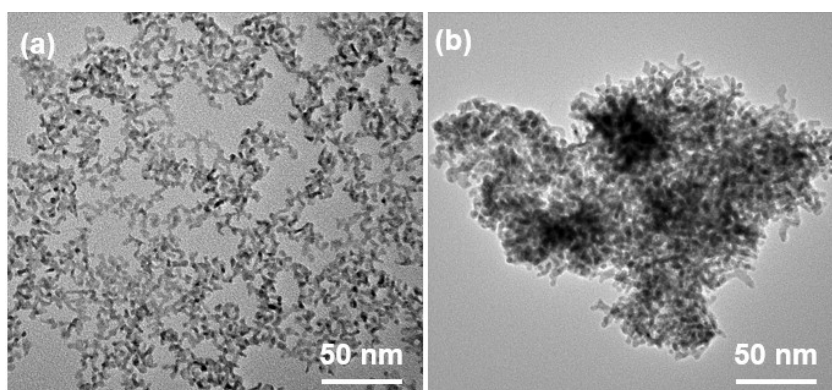

**Fig. S7** TEM images of RhCo nanostructures synthesized under (a) lower and (b) higher temperatures of reaction solution.

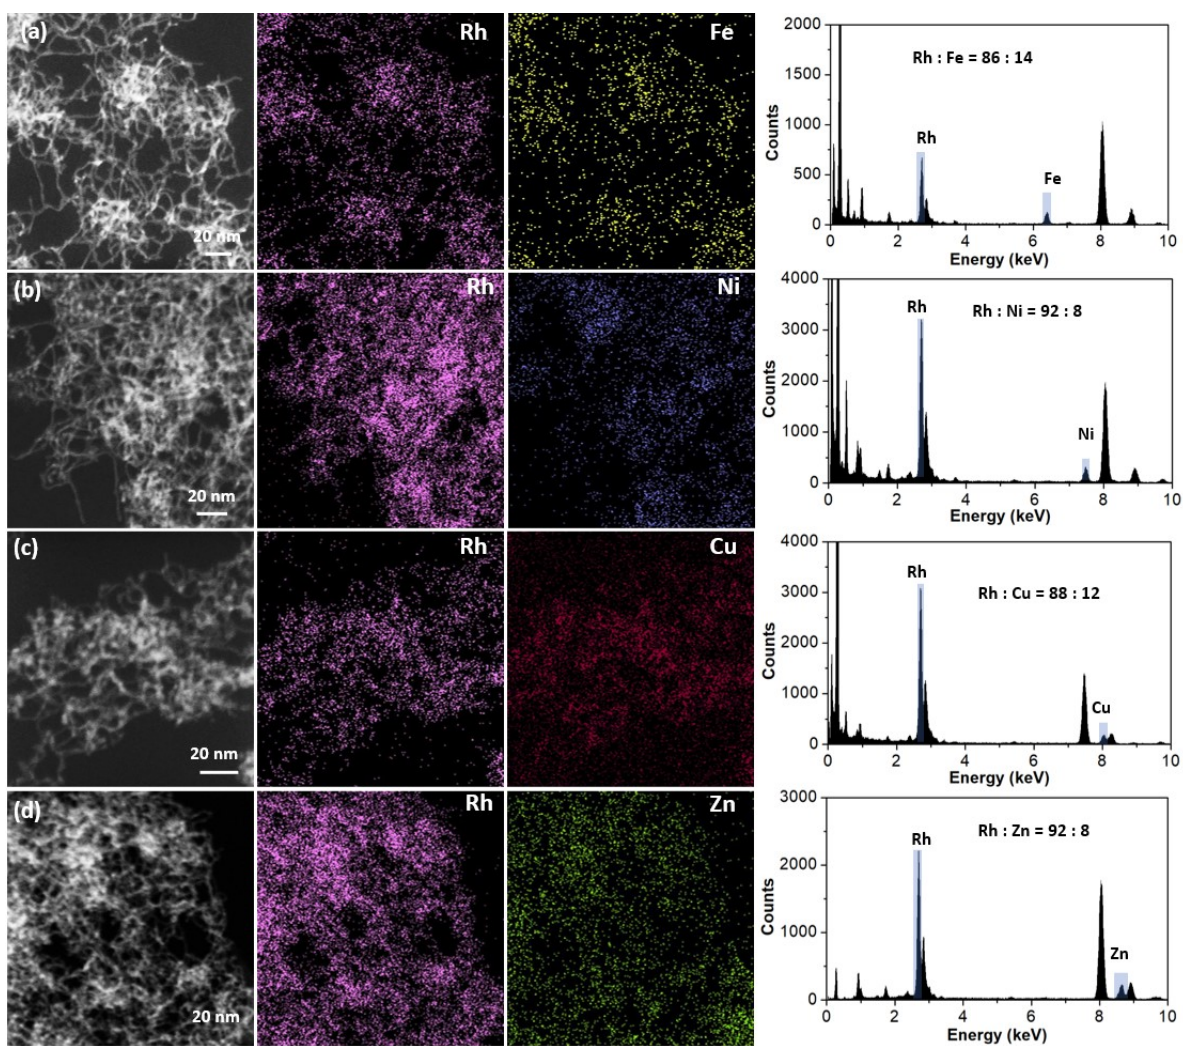

**Fig. S8** HAADF-STEM images and corresponding EDS mapping spectra of (a) RhFe NWs, (b) RhNi NWs, (c) RhCu NWs, and (d) RhZn NWs. Note: carbon coated Cu TEM grid was used for RhFe, RhNi, and RhZn NWs, while carbon coated Ni TEM grid was used for RhCu NWs.

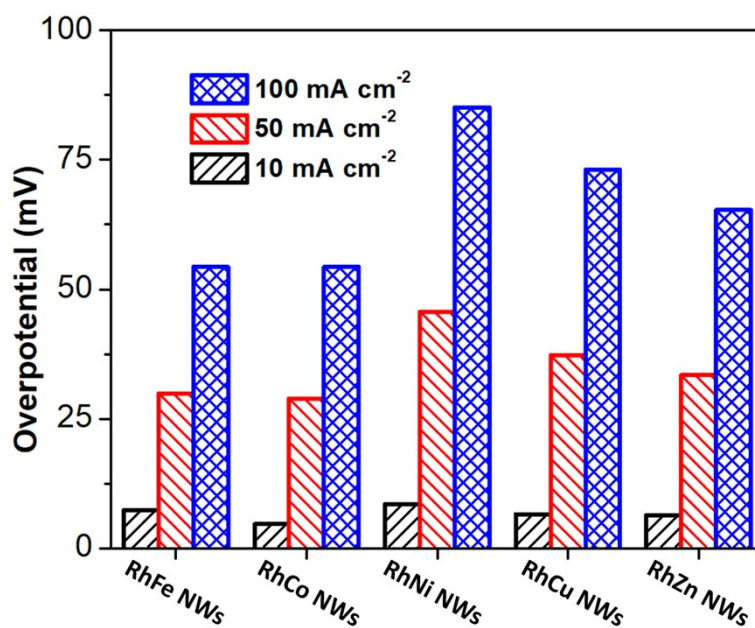

**Fig. S9** Summarized overpotentials of one-dimensional RhM alloy NWs collected from Fig. 4a.

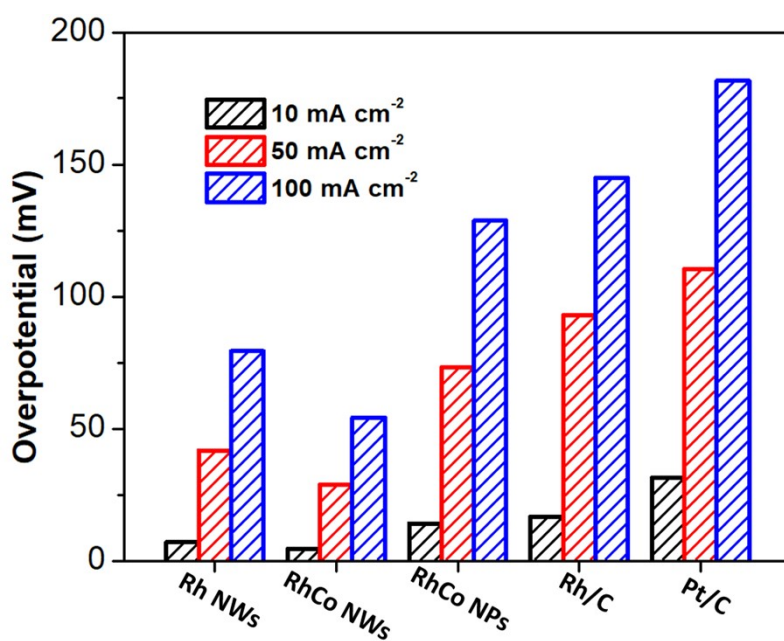

**Fig. S10** Summarized overpotentials of Rh NWs, RhCo NWs, RhCo NPs, Rh/C, and Pt/C collected from Fig. 4b.



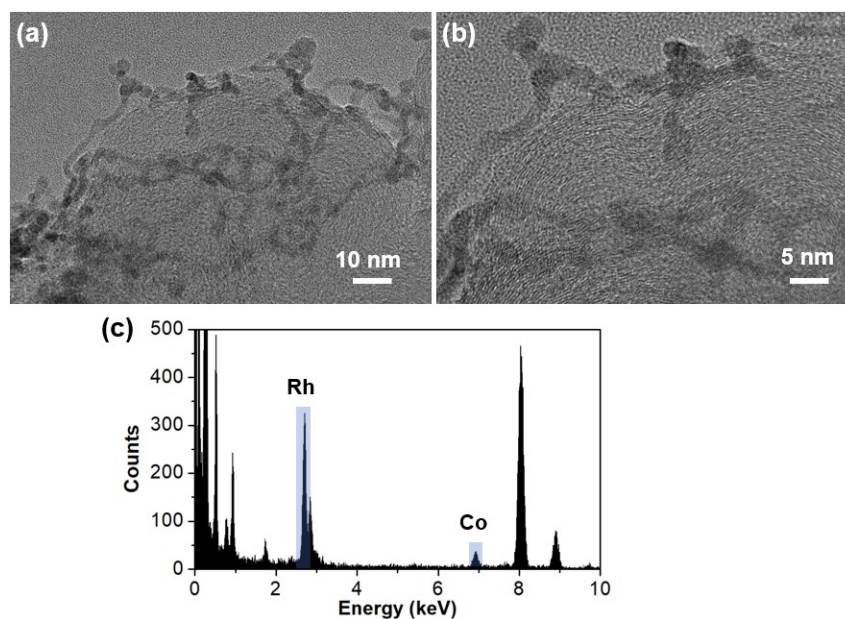

**Fig. S11** (a, b) TEM images and (c) corresponding EDS spectrum of RhCo NWs collected after HER electrocatalysis.

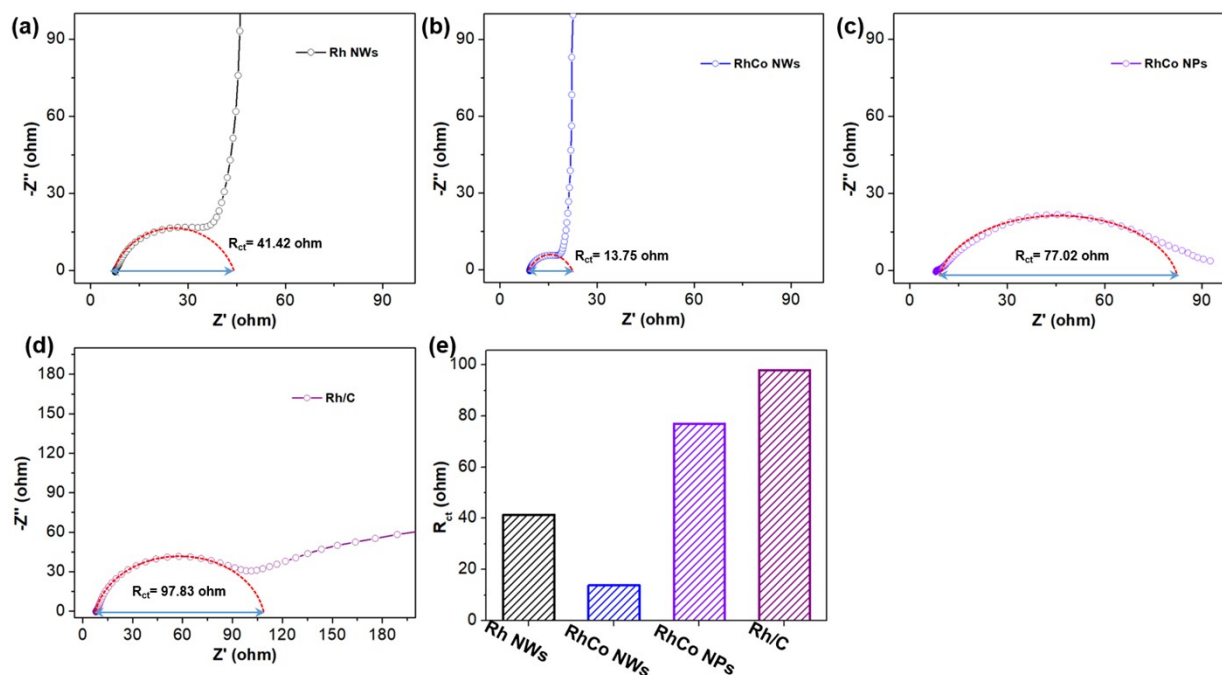

**Fig. S12** The  $R_{ct}$  value of (a) Rh NWs, (b) RhCo NWs, (c) RhCo NPs, and (d) Rh/C. (e) Summarized  $R_{ct}$  values of Rh NWs, RhCo NWs, RhCo NPs, and Rh/C.

Note for Fig. S12: The  $R_{ct}$  of RhCo NWs and Rh NWs were deeply lower than RhCo NPs and Rh/C, which indicated that the bigger aspect ratio of nanowires would accelerate the formation of a percolation network and facilitated the electron transfer.

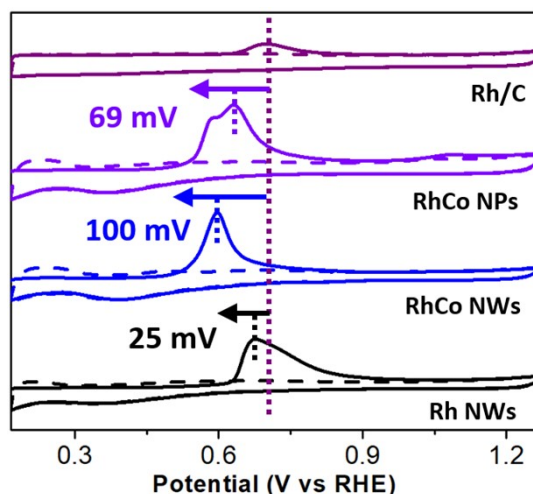

**Fig. S13** Electrochemical CO stripping plots of Rh NWs, RhCo NWs, RhCo NPs, and Rh/C.

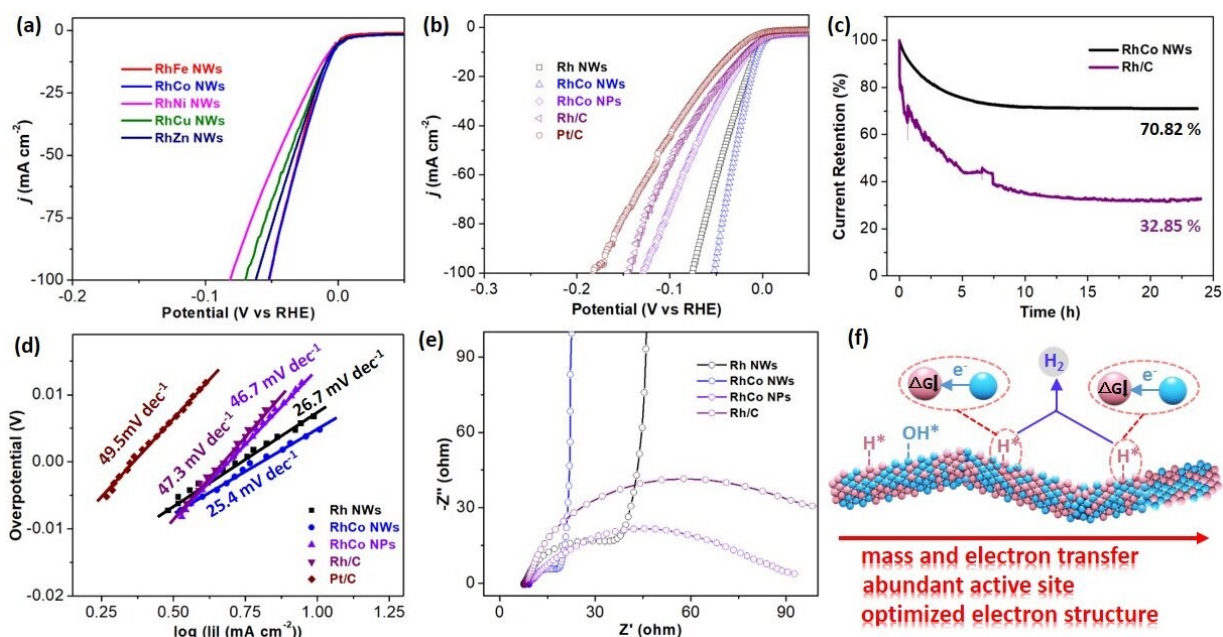

**Fig. S14** Enlarged Fig. 4 showed in the Manuscript. (a) LSV curves of RhM alloy NWs collected in  $N_2$ -saturated 1.0 M KOH. (b) LSV curves and (c) chronoamperometry stability of RhCo NWs and corresponding counterpart electrocatalysts collected in  $N_2$ -saturated 1.0 M KOH. (d) Tafel plots and (e) EIS curves of Rh NWs, RhCo NWs, RhCo NPs, and Rh/C. (f) Schematic illustration of high activity of RhCo NWs in HER electrocatalysis

**Table R1.** Comparison of electrocatalytic HER performance of our electrocatalysts and some recently reported counterparts in alkaline electrolytes.

| Catalyst                                 | Loaded Catalysts Amount (mg cm <sup>-2</sup> ) | Current Density (mA cm <sup>-2</sup> ) | Overpotential (mV) | Reference                                            |
|------------------------------------------|------------------------------------------------|----------------------------------------|--------------------|------------------------------------------------------|
| Rh NWs                                   | 0.042                                          | 10                                     | 7.37               | This work                                            |
| RhCo NWs                                 | 0.042                                          | 10                                     | 4.62               | This work                                            |
| Rh NSs                                   | 0.017                                          | 10                                     | 37.8               | <i>Sci. Adv.</i> <b>2021</b> , 7, eabd6647           |
| w-Rh <sub>2</sub> P NS/C                 | 0.0123                                         | 10                                     | 18.3               | <i>Adv. Energy Mater.</i> <b>2018</b> , 8, 1801891   |
| Rh/RhO <sub>2</sub> nanoparticle         | 0.20                                           | 10                                     | 14                 | <i>Adv. Mater.</i> <b>2020</b> , 32, 1908521         |
| P-Rh                                     | 0.022                                          | 10                                     | 20                 | <i>J. Mater. Chem. A</i> <b>2020</b> , 8, 11923      |
| Rh-Rh <sub>2</sub> P@C                   | 0.0142                                         | 10                                     | 37                 | <i>J. Mater. Chem. A</i> <b>2020</b> , 8, 12378      |
| Ir <sub>0.7</sub> Rh <sub>0.3</sub> Sb   | 0.35                                           | 10                                     | 22                 | <i>Adv. Energy Mater.</i> <b>2022</b> , 12, 2200855  |
| Pt NWs/SL-Ni(OH) <sub>2</sub>            | 0.016                                          | 4                                      | 85.5               | <i>Nat. Commun.</i> <b>2015</b> , 6, 6430            |
| Pt <sub>3</sub> Ni <sub>2</sub> -NWs-S/C | 0.015                                          | 10                                     | 42                 | <i>Nat. Commun.</i> <b>2017</b> , 8, 14580           |
| Pt <sub>1</sub> /N-C                     | 0.25                                           | 10                                     | 46                 | <i>Nat. Commun.</i> <b>2020</b> , 11, 1029           |
| PtSn <sub>4</sub> single crystal         | -                                              | 10                                     | 37                 | <i>Angew. Chem. Int. Ed.</i> <b>2019</b> , 58, 13107 |
